# Supplementary material for: Non-Cholesterol Sterol Concentrations as Biomarkers for Cholesterol Absorption and Synthesis in Different Metabolic Disorders: A Systematic Review
Source: PubMed Central journal article supplement (PMC6356200; doi:10.3390/nu11010124), 2019-01-09
Supplement: nutrients-11-00124-s001.pdf [file nutrients-11-00124-s001.pdf]

## **Supplementary Material**

### **Non-Cholesterol Sterol Concentrations as Biomarkers for Cholesterol Absorption and Synthesis in Different Metabolic Disorders: A Systematic Review**

**Sultan Mashnafi, Jogchum Plat, Ronald P. Mensink and Sabine Baumgartner \***

Department of Nutrition and Movement Sciences, NUTRIM School of Nutrition and Translational Research in Metabolism, Maastricht University Medical Center, 6200 MD Maastricht, The Netherlands; s.mashnafi@maastrichtuniversity.nl (S.M.); j.plat@maastrichtuniversity.nl (J.P.); r.mensink@maastrichtuniversity.nl (R.P.M.)

\* Correspondence: sabine.baumgartner@maastrichtuniversity.nl; Tel.: +31-43-3881305

**Table 1.** Serum non-cholesterol sterol markers in subjects with gestational diabetes.

|                      |                                                  | Sitosterol |   | Campesterol |   | Cholestanol |   | Lathosterol |   | Desmosterol |   |
|----------------------|--------------------------------------------------|------------|---|-------------|---|-------------|---|-------------|---|-------------|---|
| Miettinen, 2014 [53] | 1 <sup>st</sup> trimester                        |            |   |             |   |             |   |             |   |             |   |
|                      | Cases ( <i>n</i> = 22)                           | 0.78       | = | 1.59        | = | 1.39        | = | 1.54        | = | 0.72        | = |
|                      | Controls ( <i>n</i> = 30)                        | 0.90       |   | 1.74        |   | 1.47        |   | 1.30        |   | 0.76        |   |
|                      | 2 <sup>nd</sup> trimester Cases ( <i>n</i> = 22) | 0.86       | = | 1.74        | = | 1.80        | = | 1.44        | = | 0.75        | = |
|                      | Controls ( <i>n</i> = 30)                        | 0.97       |   | 1.89        |   | 1.81        |   | 1.32        |   | 0.75        |   |
|                      | 3 <sup>rd</sup> trimester Cases ( <i>n</i> = 22) | 0.85       | = | 1.67        | = | 2.62        | = | 1.33        | = | 0.82        | = |
|                      | Controls ( <i>n</i> = 30)                        | 0.92       |   | 1.75        |   | 2.51        |   | 1.33        |   | 0.90        |   |
|                      | 6 weeks PP Cases ( <i>n</i> = 22)                | 0.85       | = | 1.82        | = | 1.49        | = | 1.27        | = | 1.10        | = |
|                      | Controls ( <i>n</i> = 30)                        | 1.00       |   | 1.92        |   | 1.54        |   | 1.29        |   | 1.13        |   |
|                      | 6 months PP Cases ( <i>n</i> = 22)               | 0.91       | = | 1.87        | = | 1.40        | = | 1.55        | = | 0.94        | = |
|                      | Controls ( <i>n</i> = 30)                        | 0.99       |   | 1.93        |   | 1.41        |   | 1.42        |   | 0.89        |   |
|                      | 12 weeks PP Cases ( <i>n</i> = 22)               | 0.91       | = | 1.86        | = | 1.38        | = | 1.37        | = | 0.85        | = |
|                      | Controls ( <i>n</i> = 30)                        | 0.96       |   | 1.92        |   | 1.45        |   | 1.21        |   | 0.74        |   |

Values are mean and expressed in  $\mu\text{mol}/\text{mmoL}$  cholesterol. Non-cholesterol markers are not-significantly different (=) between cases and controls.
